# Supplementary material for: Resourceful utilization of methylene blue-contaminated water for the fabrication of an ultra-stable supercapacitor device
Source: Royal Society of Chemistry journal article supplement (doi:10.1039/d2se01022d), 2023-01-01
Supplement: d2se01022d1.pdf [file d2se01022d1.pdf]

# Resourceful utilization of methylene blue contaminated water for fabrication of ultra stable supercapacitor device

Sourav Acharya<sup>a</sup>, Subhodip Bag<sup>a</sup>, Shrabani De<sup>a</sup>, Chandan Kumar Maity<sup>a</sup> G. C. Nayak,<sup>\*,a</sup>

<sup>a</sup>Department of Chemistry & Chemical Biology, Indian Institute of Technology (ISM), Dhanbad-826004 Jharkhand, India

\* E-mail Id of Corresponding author: [gcnayak@iitism.ac.in](mailto:gcnayak@iitism.ac.in)

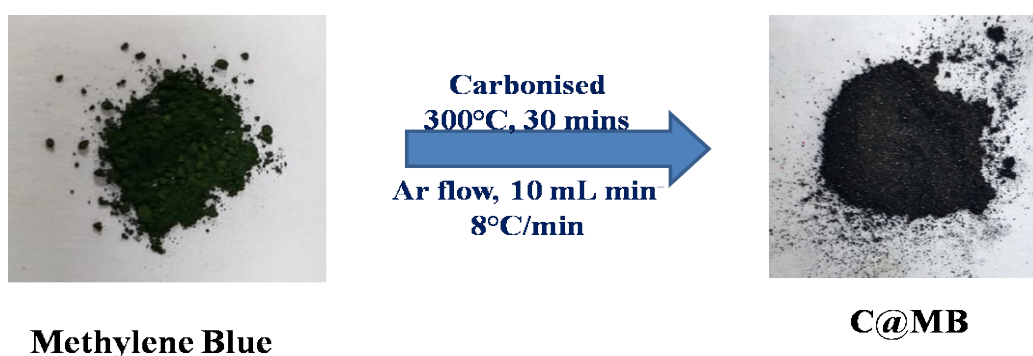

**Figure S1. Outline of synthesis of C@MB**

## **S1. Preparation of SnS<sub>2</sub>-MB-H:**

For find out whether carbon is actually deposited on surface of SnS<sub>2</sub>, SnS<sub>2</sub>-MB-H was synthesized and characterized. The synthesis process is as follows. SnS<sub>2</sub> was prepared as discussed in section 2.4. SnS<sub>2</sub> as prepared was then saturated with MB through adsorption using the optimized conditions obtained for C-SnS<sub>2</sub> in the adsorption study. The sample thus obtained was heat treated using the same conditions as used for the preparation of C-SnS<sub>2</sub>-MB-H as discussed in section 2.6 that is, heating at 300 °C in Ar atmosphere through a heating rate of 8 °C min<sup>-1</sup>. Thus the sample thus obtained was named **SnS<sub>2</sub>-MB-H**.

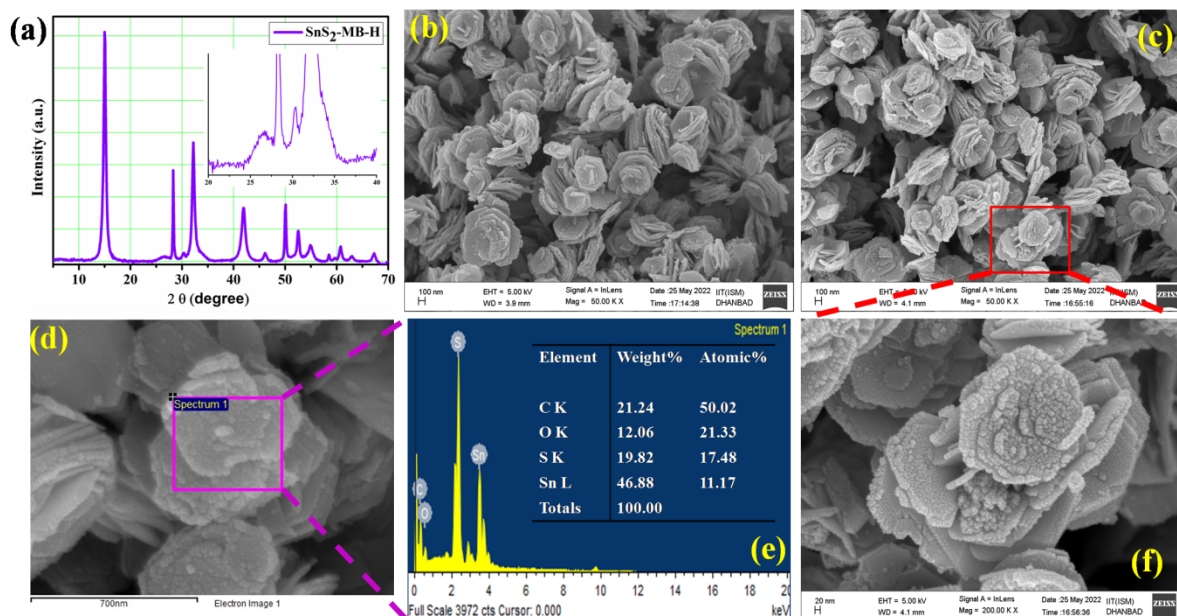

**Figure S2.** (a) PXRD of SnS<sub>2</sub>-MB-H (b) FESEM image of SnS<sub>2</sub> (c) FESEM images of SnS<sub>2</sub>-MB-H (d) FESEM images of SnS<sub>2</sub>-MB-H where EDX analysis was performed (e) FESEM EDX spectrum of SnS<sub>2</sub>-MB-H with inset table showing the respective elemental percentages (f) Magnified FESEM images of SnS<sub>2</sub>-MB-H showing the carbon deposition.

**Table S1. Raman data of composites**

| Synthesized material     | D band position (cm <sup>-1</sup> ) | G band position (cm <sup>-1</sup> ) | I <sub>D</sub> /I <sub>G</sub> |
|--------------------------|-------------------------------------|-------------------------------------|--------------------------------|
| C@grass                  | 1334.82                             | 1573.73                             | 0.944                          |
| C@MB                     | 1323.67                             | 1556.17                             | 0.992                          |
| C-SnS <sub>2</sub>       | 1330.04                             | 1577.81                             | 0.959                          |
| C-SnS <sub>2</sub> -MB-H | 1330.04                             | 1577.81                             | 0.995                          |

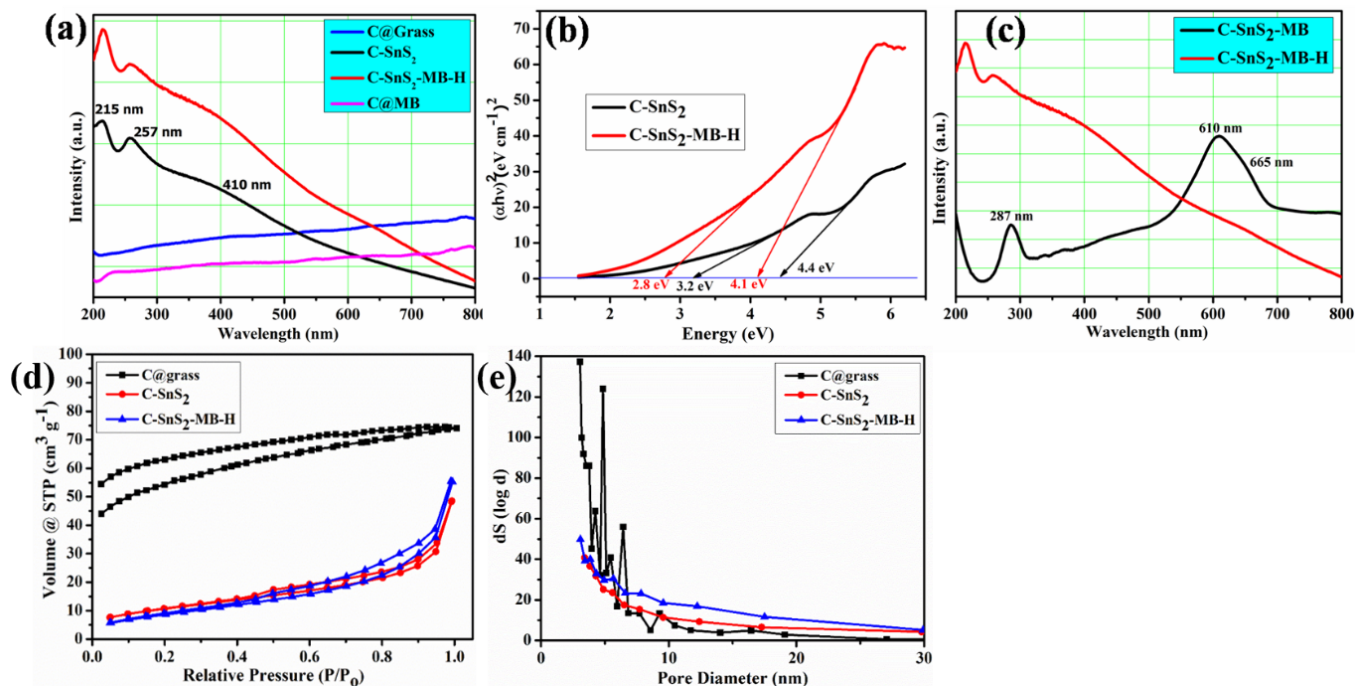

Figure S2. (a) UV-Vis analysis of the synthesized composites (b) Tauc plot of C-SnS<sub>2</sub> and C-SnS<sub>2</sub>-MB-H (c) UV-Vis spectra of dispersions of same amount of C-SnS<sub>2</sub>-MB and C-SnS<sub>2</sub>-MB-H in water (d) BET analysis of the samples (e) Pore size distribution analysis

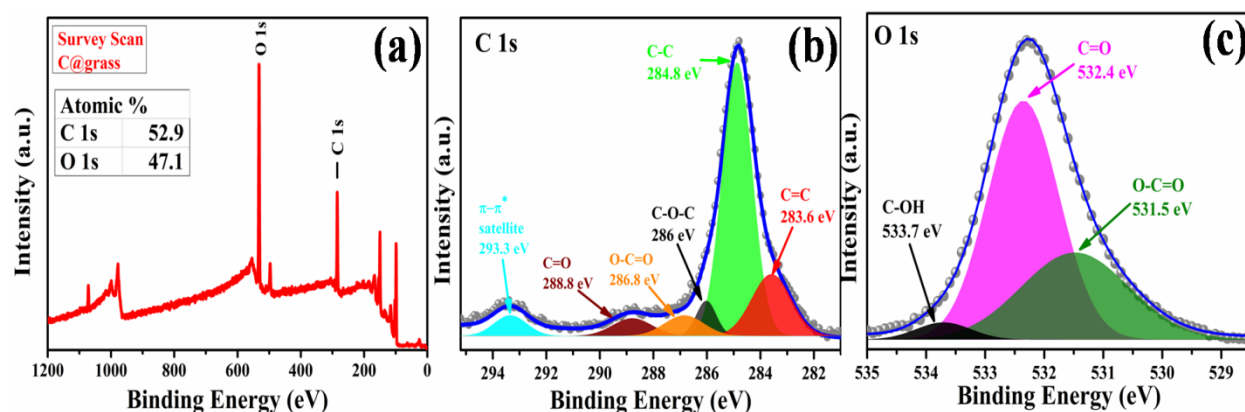

Figure S3. XPS analysis of C@Grass (a) Surface survey plot and core level plots of (b) C1s and (c) O1s

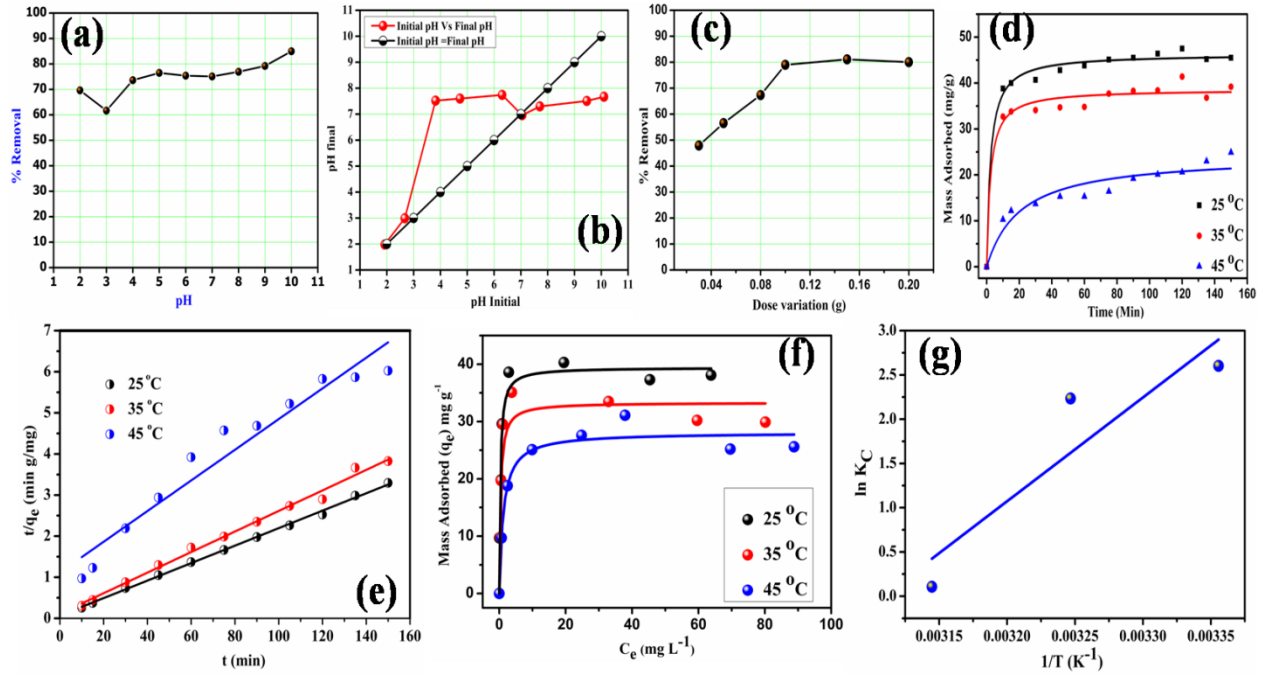

**Figure S4.** (a) % Removal of MB with pH variation (b)  $P_{zc}$  study of C-SnS<sub>2</sub> (c) % Removal of MB with dose variation (d) Effect of contact time on adsorption (e) Fit of the time variation data using pseudo-second-order model (f) Fit of concentration variation data to Langmuir isotherm (g) Plot of  $\ln(K_c)$  vs  $1/T$  for calculating thermodynamic parameters

**Table S2.** Fitted data values of Nyquist plot.

| Composites               | $R_s$<br>( $\Omega$ ) | $C_{dl}$<br>(mF) | $R_{CT}$<br>(m $\Omega$ ) | N     |
|--------------------------|-----------------------|------------------|---------------------------|-------|
| C@Grass                  | 4.7                   | 128              | 1060                      | 0.678 |
| C-SnS <sub>2</sub>       | 3.02                  | 22.7             | 324                       | 0.541 |
| C-SnS <sub>2</sub> -MB-H | 3.25                  | 17.0             | 844                       | 0.546 |

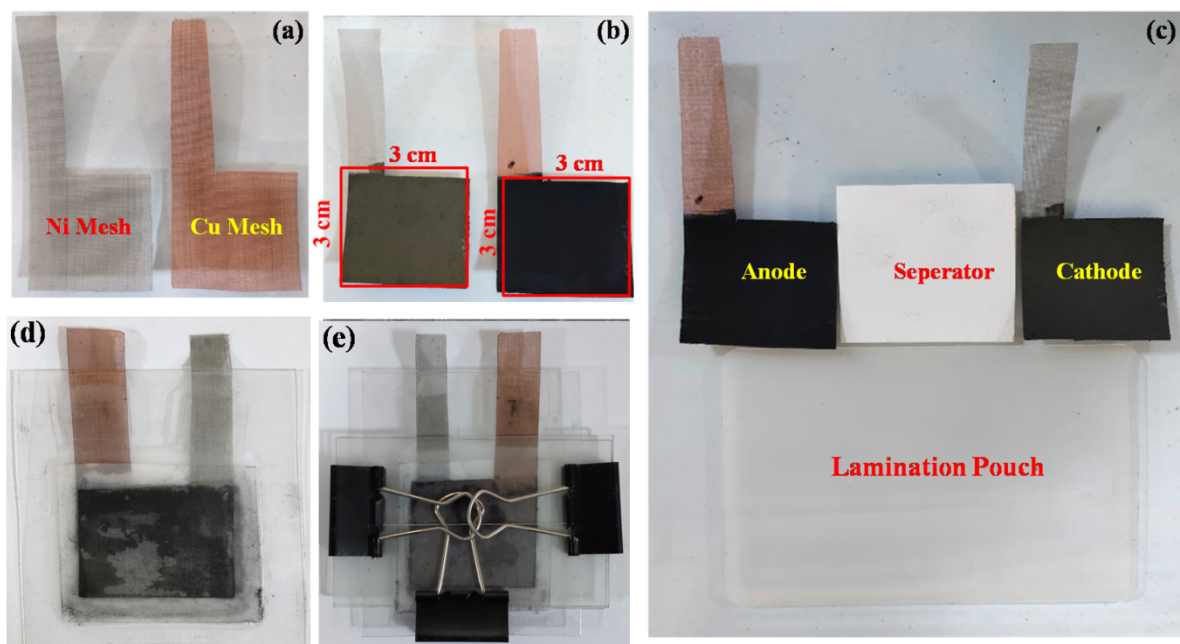

**Figure S5.** Different stages of fabrication of the device. Digital images of (a) Uncoated current collectors (b) Coated electrodes with 3 cmX 3cm coating (c) essential components of the asymmetric supercapacitor assembly (d) Fabricated device (e) Device as used for testing and 2-electrode analysis.

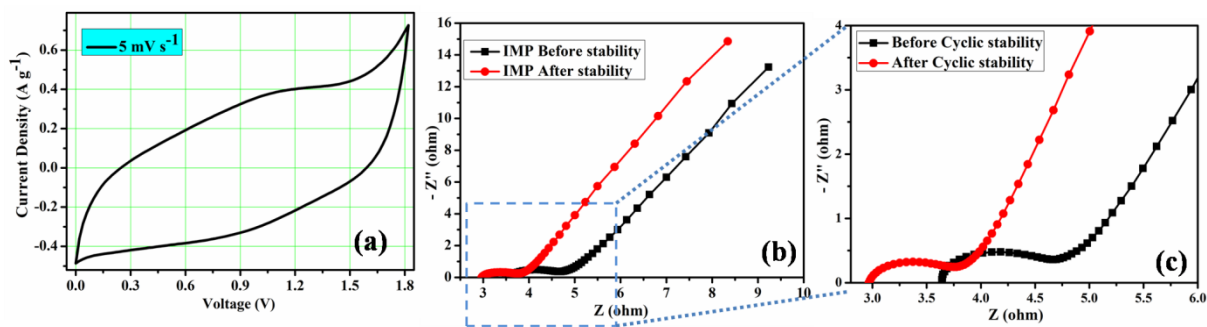

**Figure S6.** (a) CV of the device fabricated at  $5\ mV\ s^{-1}$  (b) IMP of the device before and after cyclic stability (c) Zoomed version of the IMP data

**Table S3. Specific Capacitance, ED and PD of the asymmetric supercapacitor at increasing voltage window**

| <b>Voltage Window<br/>(V)</b> | <b>Specific Capacitance<br/>(Fg<sup>-1</sup>)</b> | <b>Energy Density<br/>(Wh kg<sup>-1</sup>)</b> | <b>Power Density<br/>(kW kg<sup>-1</sup>)</b> |
|-------------------------------|---------------------------------------------------|------------------------------------------------|-----------------------------------------------|
| <b>0.8</b>                    | <b>46.0</b>                                       | <b>4.1</b>                                     | <b>0.8</b>                                    |
| <b>1.0</b>                    | <b>52.9</b>                                       | <b>7.4</b>                                     | <b>1.0</b>                                    |
| <b>1.2</b>                    | <b>62.3</b>                                       | <b>12.5</b>                                    | <b>1.2</b>                                    |
| <b>1.4</b>                    | <b>71.1</b>                                       | <b>19.4</b>                                    | <b>1.4</b>                                    |
| <b>1.6</b>                    | <b>81.4</b>                                       | <b>29</b>                                      | <b>1.6</b>                                    |
| <b>1.8</b>                    | <b>98.3</b>                                       | <b>44.3</b>                                    | <b>1.8</b>                                    |

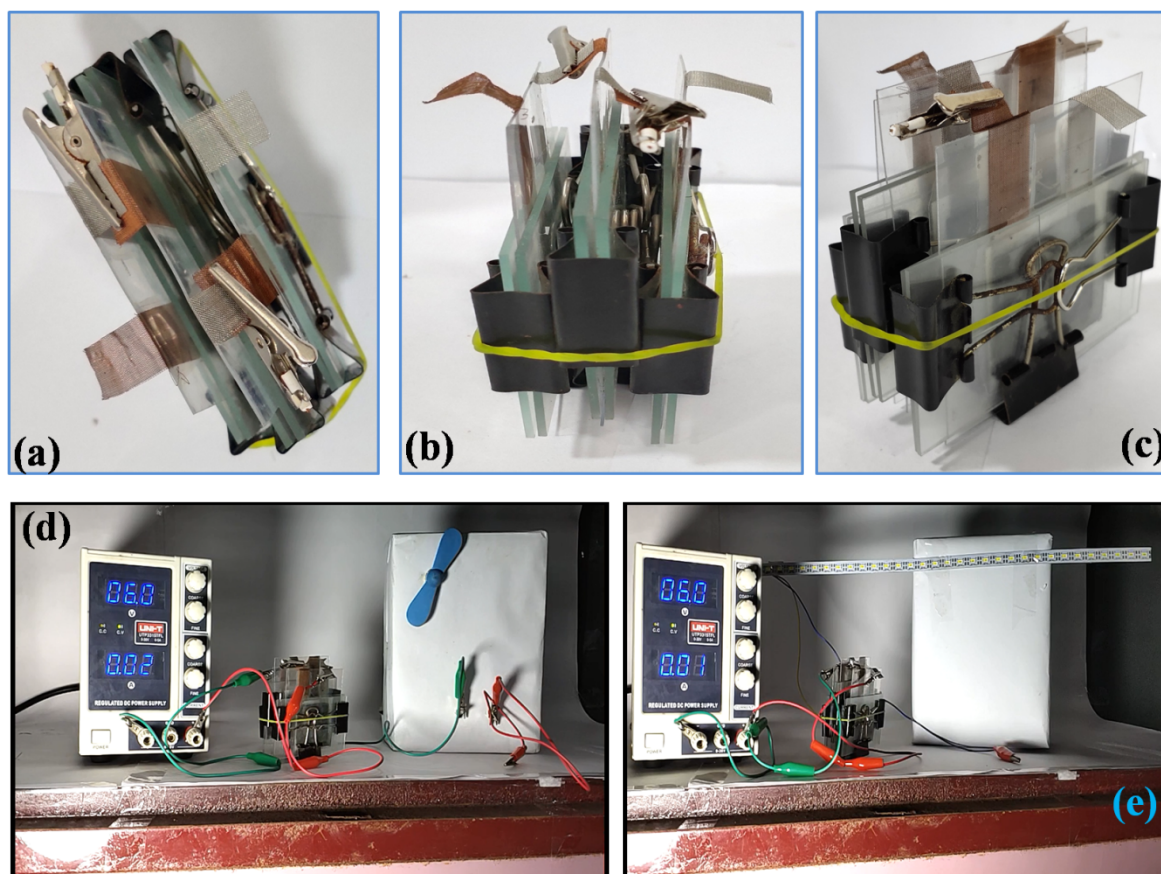

**Figure S7. Digital images of the 3 devices combined in series with viewing from (a) Top side (b) Side View (c) Diagonal view (d) Charging setup for operation of DC fan (e) Charging setup for the glowing of LED strip**

**Table S4. Comparison of the fabricated device with other reported devices.**

| Sl No | Device                                                                  | Electrolyte | Specific Capacitance (F g <sup>-1</sup> ) | Current Density (A g <sup>-1</sup> ) | Energy Density (Wh kg <sup>-1</sup> ) | Power Density (W kg <sup>-1</sup> ) | % Retention             | Voltage Window (V) | Ref          |
|-------|-------------------------------------------------------------------------|-------------|-------------------------------------------|--------------------------------------|---------------------------------------|-------------------------------------|-------------------------|--------------------|--------------|
| 1     | Ni-SnS <sub>2</sub> @Ni(OH) <sub>2</sub> -CC//AC                        | 2 M KOH     | 99.3                                      | 0.2                                  | 33.3                                  | 160                                 | 106.6 after 1000 cycles | 1.6                | <sup>1</sup> |
| 2     | SnS <sub>2</sub> -G//SnS <sub>2</sub> -G                                |             | 262.5                                     | 1                                    | 23.5                                  | 880                                 | -                       | 0.8                | <sup>2</sup> |
| 3     | SnS <sub>2</sub> -SnO <sub>2</sub> //SnS <sub>2</sub> -SnO <sub>2</sub> |             | 31.5                                      | 2                                    | 6.2                                   | 1828                                | 92 after 3000 cycles    | 0.8                | <sup>3</sup> |
| 4     | SnS <sub>2</sub> //RGO                                                  |             | 92.4                                      | 1                                    | 32.8                                  | 3600                                | 93 after 4000 cycles    | 1.6                | <sup>4</sup> |
| 5     | MoS <sub>2</sub> -SnS <sub>2</sub> //MoS <sub>2</sub> -SnS <sub>2</sub> |             | 422.2                                     | 0.5                                  | 20.17                                 | 3634.5                              | 65 after 1000 cycles    | 1                  | <sup>5</sup> |
| 6     | PANI/SnS <sub>2</sub> @CNTs /CFs symmetric device                       |             | 368.3                                     | 1                                    | 38.7                                  | 1000                                | 82.6 after 2000 cycles  | 1.4                | <sup>6</sup> |
| 7     | C-SnS <sub>2</sub> -MB-H//C@Grass                                       |             | 98.3                                      | 1                                    | 44.2                                  | 1800                                | 97 after 10000 cycles   | 1.8                | This work    |

**References**

1. M. Liang, X. Li, Y. Kang, N. ur RehmanLashari, X. Zhang, Y. Zhao, H. Wang, Z. Miao and C. Fu, *Journal of Power Sources*, 2022, **535**, 231486.
2. S. P. Lonkar, V. V. Pillai, S. P. Patole and S. M. Alhassan, *ACS Applied Energy Materials*, 2020, **3**, 4995-5005.
3. P. Asen, M. Haghghi, S. Shahrokhian and N. Taghavinia, *Journal of Alloys and Compounds*, 2019, **782**, 38-50.
4. M. Sajjad, Y. Khan and W. Lu, *Journal of Energy Storage*, 2021, **35**, 102336.

5. P. K. Enaganti, V. Selamneni, P. Sahatiya and S. Goel, *New Journal of Chemistry*, 2021, **45**, 8516-8526.
6. Z. Zhang, L. Feng, P. Jing, X. Hou, G. Suo, X. Ye, L. Zhang, Y. Yang and C. Zhai, *Journal of Colloid and Interface Science*, 2021, **588**, 84-93.
